# Supplementary material
Source: MDPI journal article supplement (https://www.mdpi.com/2076-3417/12/16/8223)
Supplement: s1 [file s1]

# UiO-66/Palygorskite/TiO<sub>2</sub> ternary composites as adsorbents and photocatalysts for methyl orange removal

Thaleia Ioannidou <sup>1</sup>, Maria Anagnostopoulou <sup>2</sup>, Dimitrios Papoulis <sup>3</sup>, Konstantinos C. Christoforidis <sup>1,2,\*</sup>, and Ioanna A. Vasiliadou <sup>1,\*</sup>

<sup>1</sup> Department of Environmental Engineering, Democritus University of Thrace, Xanthi 67100, Greece

<sup>2</sup> Institute of Chemistry and Processes for Energy, Environment and Health (ICPEES) UMR7515 CNRS, ECPM, University of Strasbourg, 25 rue Becquerel, CEDEX 2, 67087 Strasbourg , France

<sup>3</sup> Department of Geology, University of Patras, 26504 Patras, Greece

\* Correspondence: I.A.V. [ioavasil@env.duth.gr](mailto:ioavasil@env.duth.gr); K.C.C. [kochristo@env.duth.gr](mailto:kochristo@env.duth.gr)

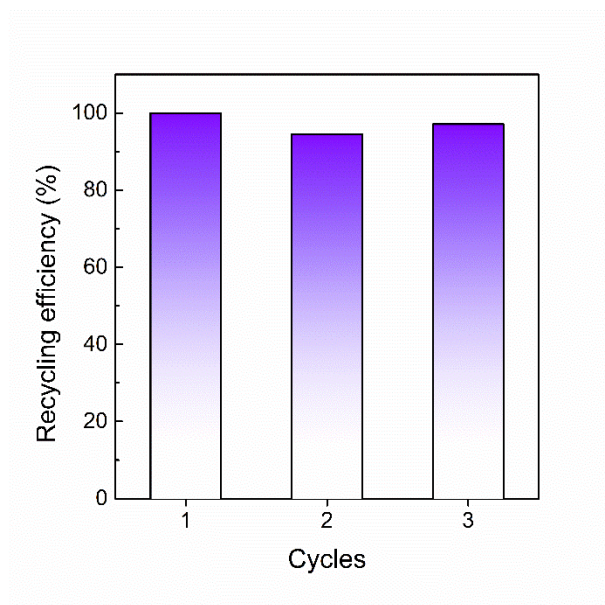

**Figure S1.** % removal efficiency of MO by the PU composite over three consecutive cycles.
